# Supplementary material for: Immunogenicity of Candidate MERS-CoV DNA Vaccines Based on the Spike Protein
Source: PubMed Central journal article supplement (PMC5362948; doi:10.1038/srep44875), 2017-03-23
Supplement: srep44875-s1.pdf [file srep44875-s1.pdf]

# **Immunogenicity of Candidate MERS-CoV DNA Vaccines Based on the Spike Protein**

Sawsan S Al-amri<sup>1</sup>, Ayman T Abbas<sup>1,2</sup>, Loai A Siddiq<sup>1</sup>, Abrar Alghamdi<sup>1</sup>,  
Mohammad A. Sanki<sup>3</sup>, Muhanna K Al-Muhanna<sup>4</sup>, Rowa Y Alhabbab<sup>1,5</sup>, Esam I  
Azhar<sup>1,5</sup>, Xuguang Li<sup>6</sup>, Anwar M Hashem<sup>1,7\*</sup>

<sup>1</sup> Special Infectious Agents Unit, King Fahd Medical Research Center, King Abdulaziz University, Jeddah, Saudi Arabia.

<sup>2</sup>Biotechnology Research Laboratories, Gastroenterology Surgery Center, Mansoura University, Mansoura, Egypt.

<sup>3</sup> Hematology Laboratory, King Abdulaziz University Hospital, Jeddah, Saudi Arabia.

<sup>4</sup> Materials Science Research Institute, National Nanotechnology Center, King Abdulaziz City for Science and Technology (KACST), Riyadh, Saudi Arabia

<sup>5</sup> Department of Medical Laboratory Technology, Faculty of Applied Medical Sciences, King Abdulaziz University, Jeddah, Saudi Arabia.

<sup>6</sup> Center for Vaccine Evaluation; Biologics and Genetic Therapies Directorate; Health Canada; Ottawa, Ontario, Canada

<sup>7</sup> Department of Medical Microbiology and Parasitology Faculty of Medicine, King Abdulaziz University, Jeddah, Saudi Arabia.

**\* Corresponding author**

Email: [amhashem@kau.edu.sa](mailto:amhashem@kau.edu.sa) (AMH)

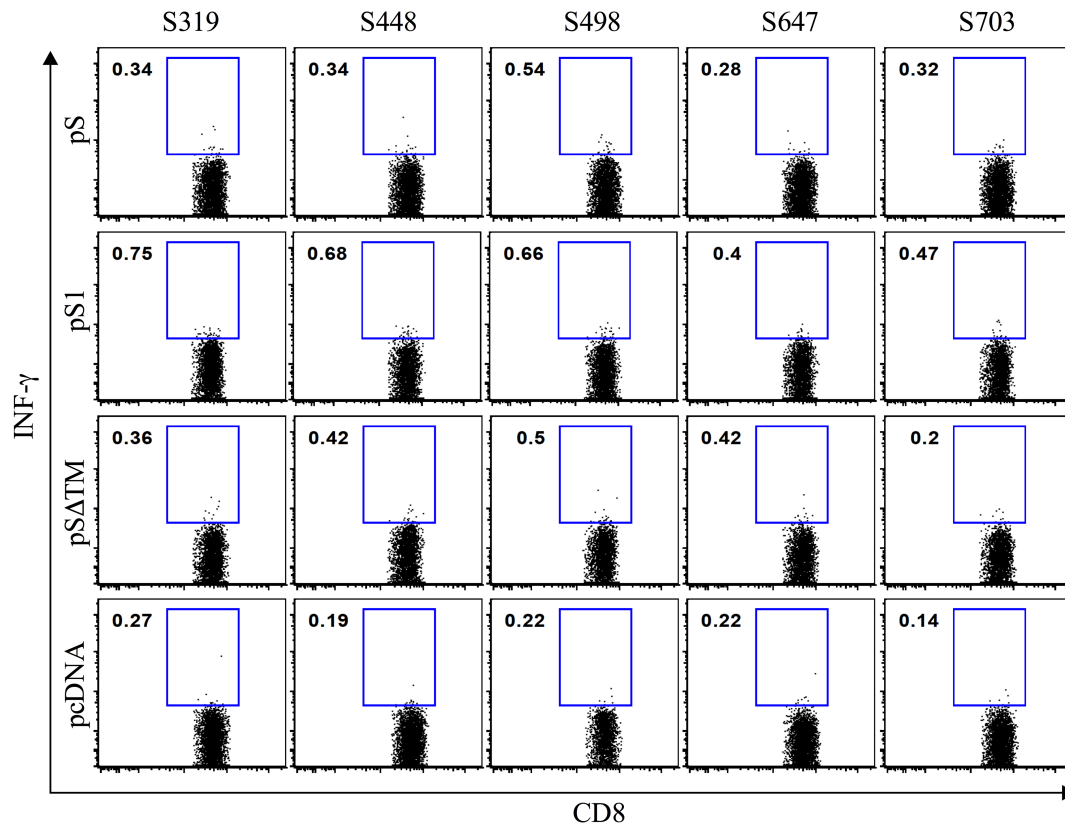

**Supplementary Figure 1. MERS-CoV Spike-specific memory CD8<sup>+</sup> T cell responses.** Immunized BALB/c mice were sacrificed at 3 weeks after 2<sup>nd</sup> boosting and splenocytes were isolated and re-stimulated *ex vivo* with several synthetic S1 peptides for IFN- $\gamma$  measurement by ICS. Live CD8<sup>+</sup> T cells were stained for intracellular IFN- $\gamma$ . Plots are representatives from one out of two independent experiments with n = 3 mice per treatment group in each experiment.

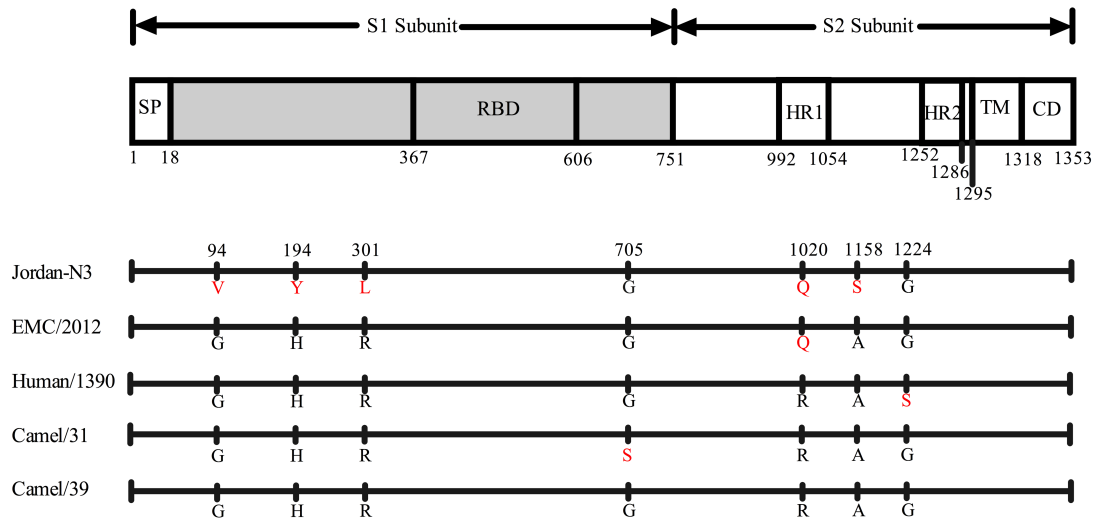

**Supplementary Figure 2. Comparison of MERS-CoV Spike glycoprotein sequences across strains used in live virus microneutralization assay.** A schematic representation of MERS-CoV S protein is shown with alignment of MERS-CoV S sequences of Jordan-N3 (GenBank ID: KC776174.1) and EMC/2012 (GenBank ID: JX869059.2) as well as the three strains used in this study from 2015 (Human/1390) and 2016 (Camel/31 and Camel/39). The amino acid differences are shown in red in comparison to the consensus sequence. SP: signal peptide; RBD: receptor-binding domain; HR1: heptad repeats 1; HR2: heptad repeats 2; TM: transmembrane domain; CD: cytoplasmic domain.
